# Large shifts among eukaryotes, bacteria, and archaea define the vertical organization of a lake sediment

Christian Wurzbacher<sup>1,2,3,\*</sup>, Andrea Fuchs<sup>1,4</sup>, Katrin Attermeyer<sup>1,5</sup>, Katharina Frindte<sup>1,6</sup>, Hans-Peter Grossart<sup>1,7</sup>, Michael Hupfer<sup>1</sup>, Peter Casper<sup>1</sup>, Michael T. Monaghan<sup>1,2</sup>

<sup>1</sup> Leibniz-Institute of Freshwater Ecology and Inland Fisheries, Germany

<sup>2</sup> Berlin Center for Genomics in Biodiversity Research, Germany

<sup>3</sup> University of Gothenburg, Sweden

<sup>4</sup> University Oldenburg, Germany

<sup>5</sup> Uppsala University, Sweden

<sup>6</sup> Bonn University, Germany

<sup>7</sup> Potsdam University, Germany

\* christian@wurzbacher.cc

## Abstract

Sediments are depositional areas where particles sink from water columns, but they are also microbial hotspots that play an important role in biogeochemical cycles. Unfortunately, the importance of both processes in structuring microbial community composition has not been assessed. We surveyed all organismic signals of the last ca. 170 years of sediment by metabarcoding, identifying global trends for eukaryotes, bacteria, archaea, and monitored 40 sediment parameters. We linked the microbial community structure to ongoing and historical environmental parameters and defined three distinct sediment horizons. This not only expands our knowledge of freshwater sediments, but also has profound implications for understanding the microbial community structure and function of sediment communities in relation to future, present, and past environmental changes.

# Introduction

The continuous deposition of organic and inorganic particles to sediments is an important process in all aquatic ecosystems. Approximately one-third of the terrestrial organic matter (OM) that enters freshwater is sequestered in sediments [1], although the total amount of OM that reaches the sediments is much greater than the amount that is actually sequestered [2]. This is because microbial activity is responsible for the cycling of carbon, including methane emission [3]. In lake sediments, newly settled OM is rapidly recycled and subsequently transformed into secondary compounds in a distinct uppermost sediment zone of high heterotrophic activity [4,5]. This is thought to lead to the structuring of microbial communities along steeper environmental gradients and narrower vertical sequences of electron acceptors in freshwater as compared to marine sediments [6], presumably due to the higher OM content at the sediment surface. The nature of this gradient influences the carbon, nitrogen, and sulfur cycles [7–9] and potentially affects the microbial community structure [10].

In contrast to the wealth of studies on marine sediments (cf. the 65 studies of [11]), few studies have examined the vertical microbial community structure of freshwater sediments (e.g., [12–16]). This community of sediment microbes was thought to be dominated by bacteria, together with a smaller fraction of methanogenic archaea (reviews in [6,17,18]). However, this view has been challenged by the recent discovery of an abundance of non-methanogenic archaea in marine sediments [19]. They are assumed to be adapted to low-energy environments, and at least one lineage seems to be specialized in inter alia amino acid turnover [19]. This discovery has led to a greatly revised perception of microbial communities in marine sediments, where archaea appear to be as abundant as bacteria and increase in relative abundance with sediment depth [11]. Data on sediment archaea in freshwater are scarce, and the causes of the significant variation observed among studies remain largely unknown

(e.g., [14, 20–22]). 27

Overall prokaryotic activity, biomass, and cell numbers decrease with depth in 28  
many freshwater and marine sediments, even in the uppermost layer (e.g., [23, 24]). 29  
Nonetheless, several studies report similar vertical proportions of active cells and find 30  
no accumulation of dead cells in deeper sediments [5, 25]. Despite the continuous 31  
presence of vegetative cells and resting stages, recent studies of marine systems 32  
indicate that the majority of microbial cells in energy-deprived horizons consist of 33  
microbial necromass [26, 27] and the proportion of living organisms decreases with 34  
the increasing age of the sediment. The vertical, progressive OM transformation and 35  
the depletion of electron acceptors may eventually lead to an extreme low-energy 36  
environment in deeper sediment layers and very slow cell turnover rates, as suggested 37  
for sub-seafloor sediments [28]. One of the basic mechanisms thought to explain the 38  
vertical distribution of microbes is a one-way input of new microbial communities 39  
attached to sinking OM. This leaves us with two simplified, competing structural 40  
models: (i) The sediment community is exclusively colonized from the surface, thus 41  
the community originating from the water column has a fully nested structure that 42  
gradually turns from a complex and rich community at the surface to a structure 43  
dominated by progressive cell death with increasing sediment depth. (ii) The sediment 44  
community at different depth layers is structured by niche specialists that are well 45  
adapted to the specific environmental (redox-, OM-, metal-, nutrient-, etc.) conditions 46  
(see [29] for a theoretical framework). 47

The decomposition rate of settled or buried pelagic dead and living organisms 48  
can be assumed to depend primarily on the activity of the indigenous microbial 49  
community rather than on other chemical processes (e.g., depurination; [30]). Thus, 50  
the decrease in sediment DNA reported for freshwater sediment profiles (e.g., [31]) 51  
is likely to be a result of the degradation of nucleic acids from dead organisms, 52

particularly eukaryotes, whose biomass strongly decreases with depth. As a result, the decomposition of buried organisms should be a function of the active community, and yet these organisms are in a constant transition of becoming buried themselves over time. *Vice versa*, varying rates of sedimentation over decades will influence the active microbial community by, for example, shifting the redox gradient. It is known these changing (historical) lake conditions are recorded in lake sediments both as DNA signals and as chemical sediment parameters (e.g., [31]).

An important question that remains is how the decomposition processes within the sediment redox gradient are related to the burial of OM, eukaryotes, and prokaryotes [32,33]. Here, we provide a complete biogeochemical and microbial community analysis of a sediment profile of the meso-oligotrophic hardwater Lake Stechlin in northeast Germany. Our aims were to evaluate (1) the extent to which sediment habitats maintain a one-way hierarchical structure, as suggested by the one-way input of organic matter, (2) how “present” and “past” sediment parameters influence the overall community structure (Box 1), and (3) whether recent novel findings regarding the importance and vertical patterns of marine archaea [11] can be transferred to freshwater sediments. We took four replicate 30 cm deep sediment cores from ca. 30 m water depth.  $^{137}\text{Cs}$  dating indicated the cores include sediments deposited over the past 150 to 170 years. We examined the chemical conditions and microbial community structure of the cores and simultaneously assessed the vertical community composition of eukaryotes, bacteria, and archaea.

**Box 1.** *Definition of "present" and "past" sediment parameters.*

We define *present* parameters as the principal components of all context data derived from a) pore water analysis, which indicates that chemical gradients are caused by the consumption and production of ongoing biological processes (e.g., sulfate and methane), as well as from b) directly measured parameters of microbial activities (e.g., bacterial protein production). The present parameters are therefore an expression of recent microbial processes.

*Past* parameters are the principal components of conservative parameters, which once introduced into the sediments will not change significantly and are therefore an expression of the lake's history (e.g., heavy metals). Here, we also categorize the total amount of elemental carbon, nitrogen, hydrogen, and sulfur as mainly conservative parameters. The past parameters are therefore an expression of historical changes.

75

## Results

76

The sediment cores were black in color, with no visible lamination, and they had a high water content (93 – 97%). Macrozoobenthos was visually absent, and metabarcoding (see below) detected only the presence of nematodes (Figure S1). A consistent pattern across all four sites was the exponential increase of dissolved refractory carbon with sediment depth (Fluorescence Index  $[FI] = 1.69 - 2.01$ ; Figure 1), indicating the enrichment of fulvic acids [34].

77

78

79

80

81

82

Mean prokaryotic cell numbers were  $1.8 \pm 0.5 \cdot 10^9$  per ml of wet sediment and were higher in the uppermost sediment horizons. Bacterial biomass production (BPP) (range:  $0 - 282 \mu g \cdot ml^{-1} d^{-1}$ ) decreased rapidly with depth, approaching zero below 10 cm. Total DNA concentration (range  $< 0.3 - 17.6 \mu g \cdot ml^{-1}$  sediment) decreased exponentially with depth and was negatively correlated with FI ( $r = -0.886$ ). DNA half-life was inferred to be  $t_{1/2} = 22 a$  (corresponding to  $5.4 cm$ ;  $f(DNA) = 13.9 \cdot e^{-0.128x}$ ,  $r^2 = 0.81$ ). The RNA content of the sediment was lower than DNA at all depths, with DNA:RNA ratios ranging from 2.3 – 20.8 (Figure 1). The sediment exhibited a typical electron acceptor sequence with a mean oxygen penetration

83

84

85

86

87

88

89

90

91

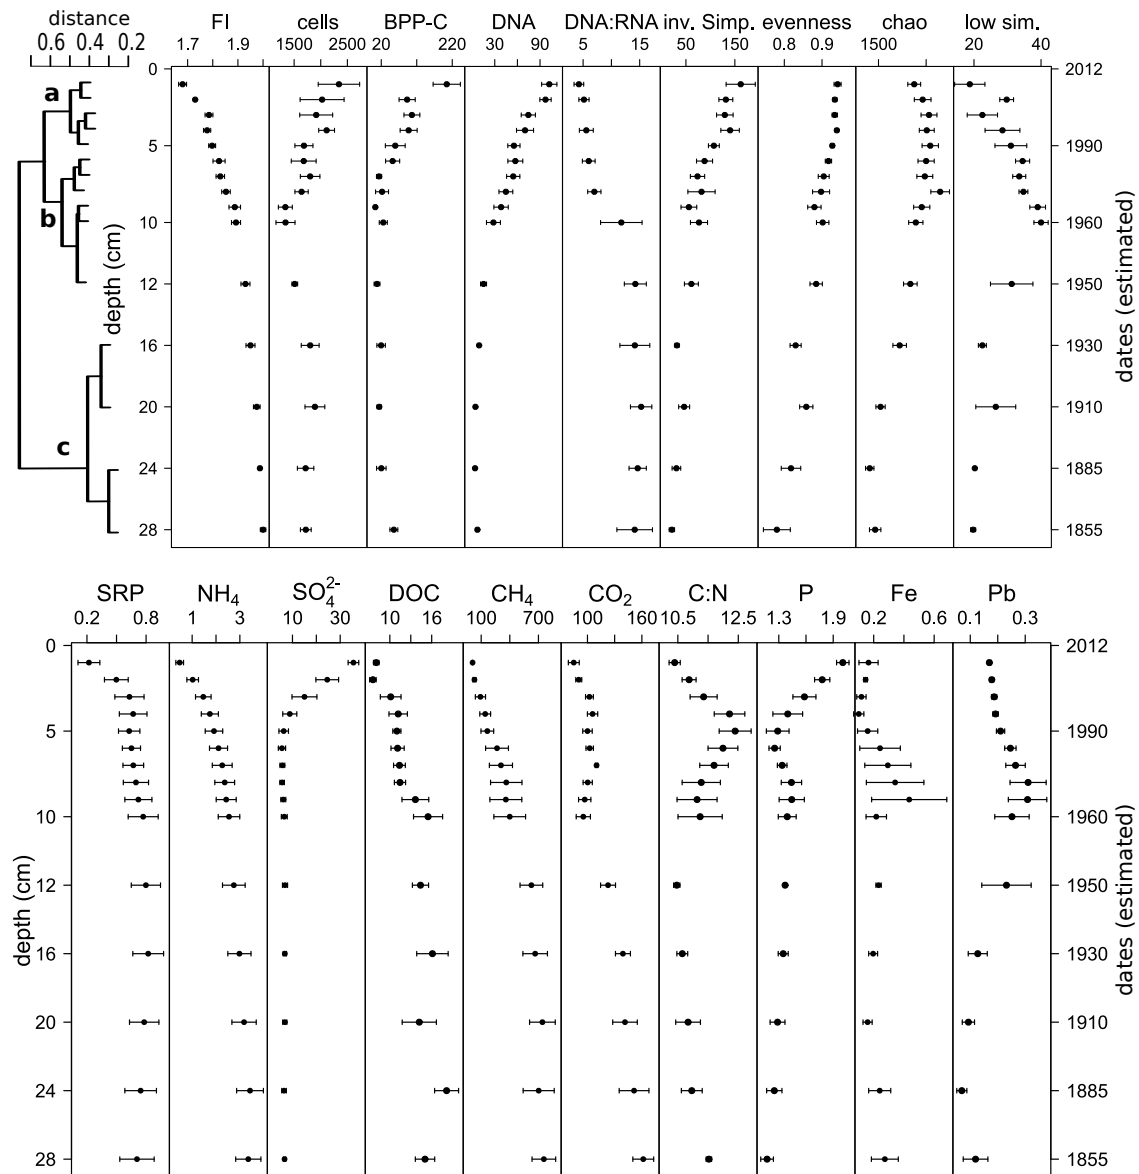

**Figure 1.** Depth profiles of a reduced set of sediment variables of Lake Stechlin at 30 m depth presented as the mean with standard error. The cluster dendrogram (average clustering) to the left presents the similarity of the total microbial community of each sampling depth and identifies the three depth horizons. A detailed version of all measured variables per individual core can be found in the supplemental material. Age values were adopted from  $^{137}\text{Cs}$  measurements. Units: cells [ $10^6 \text{ml}^{-1}$ ]; BPP-C/bacterial protein production in Carbon [ $\mu\text{g} \cdot \text{ml}^{-1} \text{d}^{-1}$ ]; DNA [ $\text{ng}$ ]; low sim. [% of sequences]; SRP [ $\text{mg} \cdot \text{l}^{-1}$ ];  $\text{NH}_4$  [ $\text{mg} \cdot \text{l}^{-1}$ ];  $\text{SO}_4^{2-}$  [ $\text{mg} \cdot \text{l}^{-1}$ ]; DOC [ $\text{mg} \cdot \text{l}^{-1}$ ];  $\text{CH}_4$  [ $\mu\text{mol} \cdot \text{l}^{-1}$ ];  $\text{CO}_2$  [ $\text{mmol} \cdot \text{l}^{-1}$ ]; P [ $\text{mg} \cdot \text{g}^{-1}$  dry weight]; Fe [ $\text{mg} \cdot \text{g}^{-1}$  dry weight]; Pb [ $\text{mg} \cdot \text{g}^{-1}$  dry weight]

depth of 4.6 *mm* (SD 1.4; Figure 1). Nitrate and nitrite were depleted rapidly, sulfate approached a constant minimum concentration after 5 *cm*, soluble reactive phosphorous (SRP) and  $NH_4^+$  increased with sediment depth,  $N_2O$  gas was not detected,  $CH_4$  increased linearly with depth, and  $CO_2$  exhibited minima at the surface and at a depth of 10 *cm* (Figure 1). Detailed vertical resolution profiles of electron acceptors and profiles of all measured parameters can be found in the supplemental material (Figure S2).

Using a Chao estimate, the taxa diversity across the 60 samples was estimated to be 8545 ( $SE = 173$ ) operational taxonomic units (OTUs). All  $\alpha$ -diversity indices (inverse Simpson, evenness, and estimated Chao index) decreased with depth. The proportion of sequences that had no close known relative in the SILVA reference database ( $< 93\%$  sequence similarity by BLAST) was highest at 10*cm* depth ( $40 \pm 4\%$ ). When we summarized the replicates and analyzed the community matrix globally using a cluster analysis, the sediment communities were grouped into three major clusters corresponding to the depth zones (0 – 5 *cm*, 5 – 14 *cm*, and 14 – 30 *cm*), with a pronounced separation at 14 *cm* (Figure 1). Sediments at 15 – 30 *cm* depth were more similar in their community composition ( $> 65\%$ ) than in the upper two clusters ( $< 50\%$ ). The community turnover (distance) follows a distance decay curve with increasing depth, approaching a distance of 1 (i.e., no shared taxa) for the lowest sediment layer compared to the surface layer (Table 1). When partitioning the  $\beta$ -diversity among sediment layers into richness and replacement effects, the effect of richness was proportional to increasing depth ( $R^2 = 0.96$ ,  $F = 230.8$ ,  $dF = 11$ , see Figure S3), but it reached significance only at the deepest sampled layer (26 – 30 *cm* depth). Taxon turnover/replacement was consistently high and significant for multiple sediment depths within the first 14 *cm* (Table 1).

The OTUs that were the most influential in shifting the community structure

**Table 1.** Jaccard based distance measures for all depths. Distance: total Jaccard based distance to the uppermost depth [0-1 cm]; repl.: replacement component of the Jaccard distance; richness: richness component of the Jaccard distance; LCBDrpl: local contribution of the replacement component; LCBDrich: local contribution of the richness component.

| depth [cm] | distance | repl. | richness | LCBDrpl  | LCBDrich |
|------------|----------|-------|----------|----------|----------|
| 0-1        | NA       | NA    | NA       | 0.083*** | 0.039    |
| 1-2        | 0.683    | 0.600 | 0.083    | 0.086*** | 0.001    |
| 2-3        | 0.668    | 0.662 | 0.006    | 0.068    | 0.050    |
| 3-4        | 0.688    | 0.659 | 0.029    | 0.057    | 0.079    |
| 4-5        | 0.735    | 0.733 | 0.003    | 0.064    | 0.052    |
| 5-6        | 0.739    | 0.709 | 0.030    | 0.070*   | 0.024    |
| 6-7        | 0.761    | 0.722 | 0.040    | 0.069    | 0.019    |
| 7-8        | 0.780    | 0.751 | 0.029    | 0.066    | 0.030    |
| 8-9        | 0.822    | 0.749 | 0.072    | 0.071**  | 0.010    |
| 9-10       | 0.824    | 0.753 | 0.071    | 0.071**  | 0.010    |
| 10-14      | 0.860    | 0.782 | 0.078    | 0.074*** | 0.011    |
| 14-18      | 0.902    | 0.720 | 0.183    | 0.063    | 0.075    |
| 18-22      | 0.920    | 0.715 | 0.206    | 0.061    | 0.113    |
| 22-26      | 0.930    | 0.689 | 0.241    | 0.056    | 0.183    |
| 26-30      | 0.934    | 0.649 | 0.285    | 0.041    | 0.304*   |

across the 15 sediment depths were identified by calculating the corresponding species contribution to  $\beta$ -diversity (Figure S4) [35]. The identities of these 96 “structuring” OTUs indicate an interrelationship of all three domains, with the most influential phyla being Euryarchaeota and Thaumarchaeota in the archaea and Chloroflexi, Proteobacteria, and Phycisphaerae in the bacteria. Redox-dependent groups (13% of the taxa could be clearly assigned to redox processes by their classification, e.g., Nitrospiraceae, Desulfobacteraceae, and Methylococcales) and redox irrelevant groups (eukaryotes and e.g., Bacteriovoraceae) structured the vertical microbial community. Out of these 96 “structuring” OTUs, we identified the OTUs that are significantly elevated in each of the three zones (Figure 2). While we see eukaryotic and bacterial lineages to be characteristic for the uppermost zone (cluster a in Figure 1), archaea and bacteria are elevated in the lowest zone (cluster c). For cluster b, only two structuring



archaeal OTUs were identified. The residual OTUs from cluster b are significantly elevated either in the upper two clusters (mainly bacteria) or in the lower two clusters (mainly archaea). Out of the structuring OTUs, only one (Methylococcales) was significantly different in all three clusters (Figure 2).

For a general overview on the median appearance of eukaryotic, bacterial, and archaeal taxa at single depth layers, see Figure S1. Globally, archaea, bacteria, and eukaryotes all exhibited pronounced vertical changes. Their sequence proportions (A:B:E) shifted from 10:70:20 at 0 *cm* to 50:50:0 at 10 *cm* and 60:40:0 at 30 *cm* depth (Figure 3A). The eukaryote pattern was correlated with the total DNA concentrations in the sediment ( $r = 0.869$ ), and it decayed exponentially with depth. We were able to predict DNA concentration using a multiple linear regression as a function of the occurrence of eukaryotes (75.6% of the variation) together with bacteria (10.0% of the variation; model:  $R^2 = 0.856$ ,  $p < 0.001$ , Figure S5). A multivariate ordination of all the samples confirmed a strong vertical gradient in the community structure, which was reflected in the distance between the surface and deep sediments on axis 1 (Figure 3B, Mantel correlation:  $r = 0.735$ ,  $p < 0.001$ ). We were able to significantly recover the three depth zones (Figure 3B, PERMANOVA:  $F = 12.3$ ,  $p = 0.0005$ ), and there was an obvious reduced variance in cluster c compared to the other clusters (betadispersal analysis: Tukey's Honest Significant Differences between groups,  $p < 0.01$ ), confirming the higher similarities seen in the previous cluster analysis. The overall community structure was correlated with both present (Mantel correlation:  $r = 0.527$ ,  $p < 0.001$ ) and past ( $r = 0.459$ ,  $p < 0.001$ ) parameters, which were nearly orthogonal in ordination. To elucidate this further, we investigated whether the past parameters may match with the richness component of the community composition, and correspondingly, whether the present parameters are correlated to the replacement component of the microbial community. Thus, we partitioned the whole dataset

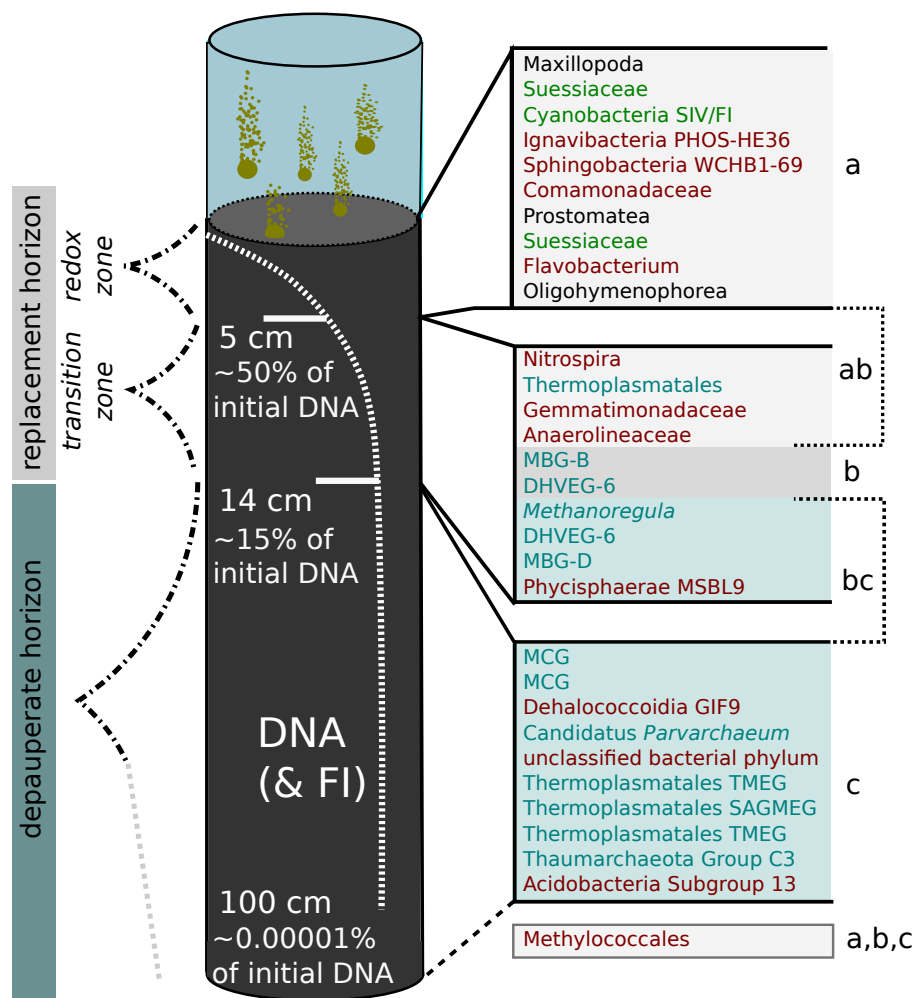

**Figure 2.** Overview on Lake Stechlin's sediment structure. The cluster analysis separates three depth horizons: The *redox-stratified zone* (0 – 5 cm), which includes a thin layer of oxygen. A few fauna species exist in this zone, i.e., Nematoda, Gastrotricha, and microeukaryotes (e.g., Ciliophora), in addition to large numbers of highly active bacteria. Below 5 cm, where 50% of the DNA is already decomposed, the system enters the *transition zone*. This zone is situated below the sulfate-methane transition. Below 14 cm, we find the *depauperate horizon*, which extends in the deeper sediment, in which archaea dominate the community. In an extrapolation of the richness component of the community structure, the loss of richness would completely dominate (100%) the microbial community at 1 m depth (approx. 500 a). Following the decay curve of the DNA, 99.99999% of the DNA would be transformed at that depth. On the right side, the 10 most structuring OTUs (from Figure S4) are listed, which were significantly elevated in the corresponding horizon (only results with  $p < 0.01$  in the TukeyHSD PostHoc Test, were included). The brackets ab and bc mark those OTUs that were elevated in the upper two or lower two zones, respectively. Only two OTUs were elevated in the transition zone. The grey box marks the single taxon that was significantly different in all three horizons. Taxon names are color coded according to their classification or phototrophy if applicable: phototrophic organism (green), eukaryotes (black), bacteria (red), archaea (blue).

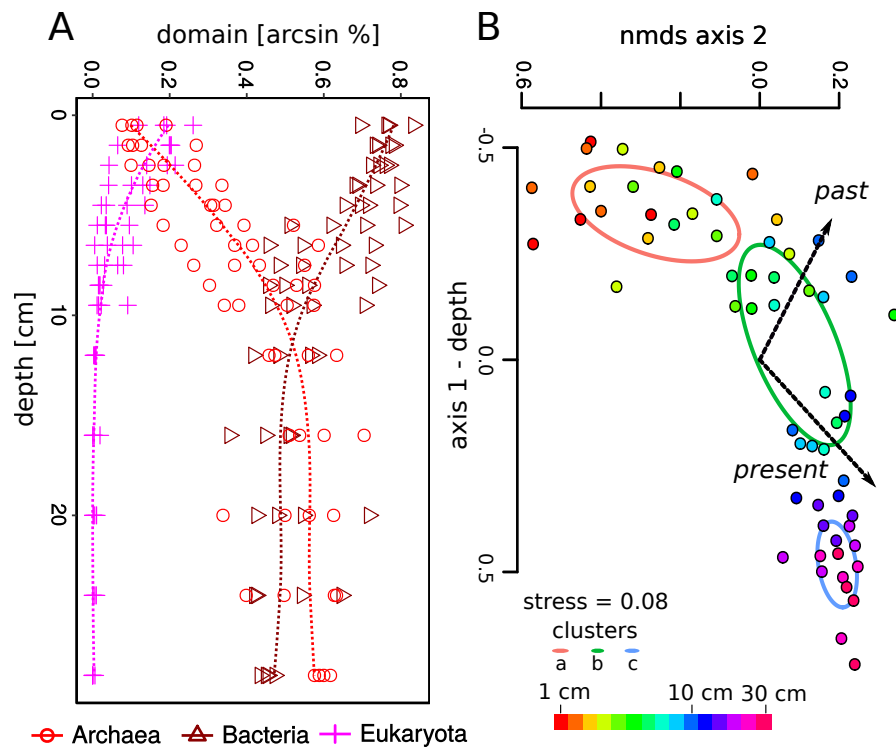

**Figure 3.** A. Depth profiles of the microbial community (eukarya, bacteria, and archaea) presented as relative proportions to each other, which was determined by relative pyrosequencing reads per microbial fraction. B. NMDS ordination of the vertical sediment microbial community structure. The clusters from Figure 1 are presented as standard deviation around the group centroid. The color scale of the dots represents sediment depth.

into replacement and richness matrices and correlated these to the present and past 156  
parameters by employing a fuzzy set analysis. The richness community submatrix was 157  
strongly correlated with the past parameters (two-dimensional fuzzy set ordination 158  
with the first 2 axis of the PCA,  $r = 0.99$ ). The replacement community submatrix 159  
was correlated with the present parameters (one-dimensional fuzzy set ordination 160  
with the first axis of the PCA,  $r = 0.65, p < 0.001$ ). 161

## Discussion 162

Comprehensive studies of the microbial communities and physic-chemical characteris- 163  
tics of freshwater sediments are scarce, and general concepts are often transferred 164  
from marine systems without validation. Often salinity and significant higher sulfate 165  
concentrations are responsible for major differences between both systems [36,37]. We 166  
address fundamental questions regarding the structure and organization of freshwater 167  
sediments and establish a structural model that can potentially be applied to other 168  
aquatic sediments. 169

## Organization of freshwater sediments 170

Although constant microbial colonization of surface sediments occurs via sinking 171  
OM, the sediment habitat is considered to be an autonomous system in terms of 172  
species diversity and community structure [17,18], with the exception of surface 173  
supply of planktonic OM, including decaying eukaryotes (Figure S4). Indications 174  
that a high species turnover, as suggested by our results, may be a common feature 175  
of vertical sediment profiles have been reported for bacterial taxa in coastal marine 176  
sediments [38], for marine archaea and bacteria [39], and for freshwater archaea [20]. 177  
Previous freshwater sediment studies that found a more moderate species turnover 178  
were restricted by the use of low-resolution methods [15,20,40]. Moreover, most 179  
studies have focused on either bacteria or archaea and not on all three domains 180  
simultaneously, and none of the previous marine or freshwater studies partitioned 181  
 $\beta$ -diversity into richness and replacement components, which allowed us to look at 182  
both buried and active taxonomic signals. 183

Our results pointed to three depth clusters. Based on the high replacment (Table 184  
1) and measurable microbial production in the first two depth clusters (cluster a, b) 185  
(Figure 1), we decided to classify them into one overarching horizon, which we called 186

the replacement horizon. Correspondingly, we classified the lowest depth cluster (cluster c) into the depauperate horizon, based on the loss in richness measures and constancy in most sediment parameters (Box 2).

**Box 2.** *Sediment zonation according to taxonomic clustering,  $\beta$ -partitioning, and context data.*

- I. The replacement horizon (1 – 14 cm|ca. 0 – 60 a) is subdivided into two zones, delineated by the sulfate-methane transition, which falls approximately within or correlates with a local prokaryotic cell maximum.
  - Cluster a) redox-stratified zone (0 – 5 cm|ca. 0 – 20 a). This zone encompasses the redox-stratified zone and the typical sequence of electron acceptors from oxygen to sulfate.  $NH_4^+$  and SRP increases. It is characterized by high microbial activity, cell numbers, taxa turnover, spatial variability, low DNA:RNA ratios, and low FI values (1.7 – 1.8). Potentially 50% of the sedimented organic matter is metabolized in this horizon, aligning with the rapid decrease of eukaryotes. Bacteria dominate this horizon.
  - Cluster b) transition zone (5–14 cm|ca. 20–60 a). This zone is characterized by strong gradients. Microbial cell numbers drop off and activity decreases, diversity decreases, the taxa turnover stays high, the DNA:RNA ratio doubles, and FI values increase (1.8 – 1.9). Methane concentrations rise, and  $CO_2$  has a local minimum. Potentially, another 35% of the sediment organic matter is turned over in this horizon. Eukaryotes approach zero, bacteria decline, and archaea rise rapidly in their community contribution. Here, we also see a maximum of taxa with no close relatives to known database entries.
- II. The depauperate horizon (14–x cm|ca. > 60 a) is very distinct from horizon I, and it is unclear how far this horizon reaches. It appears to be archaea-dominated and is characterized by a loss in richness and a shift toward the dominance of single taxa.
  - Cluster c) (14 – 30 cm|ca. 60 – 150 a). The zone is characterized by constancy in most parameters, while we see significant taxon richness effects and marked drops in spatial variability, evenness, and diversity. Cell numbers and activity stay consistently low, while DNA:RNA ratios and FI values (2.0) stay consistently high.  $CH_4$  and  $CO_2$  approach saturation. Archaea are dominant.

**The replacement horizon** Bacterial activity was highest in the redox-stratified zone (cluster a), which is where most of the settled OM is available. As sulfate is

depleted at 5 *cm* depth, most redox processes will take place above this. The majority of freshwater sediment studies examine this zone in great detail (e.g., [4, 5, 10]), including the identification of redox processes at the millimeter scale [41, 42]. Highly active decomposition processes lead to high prokaryotic cell numbers close to the sediment surface (e.g., [5, 24, 43], as well as a constantly lower abundance in deeper horizons [15]. There was also an initial loss of many taxa in the highly active oxycline –indicated in our data by an outlier to the richness community component (Figure S3)– which was potentially intensified by active grazing through, for example, ciliates and copepods. The sulfate-methane transition marks the border of the transition zone (cluster b). This border can harbor important methane oxidation processes [44]. At 10 *cm*, the  $CO_2$  minima might indicate the beginning of hydrogenotrophic methanogenesis (Figure 1). [45] described this pathway for profundal Lake Stechlin sediments. In this second subzone, the archaeal contribution rises constantly, while bacteria and eukaryotes decrease and the general activity measures decline rapidly. As indicated by the DNA measurements, more than 85% of the settled organisms were decomposed within this replacement horizon, which spanned approximately 60 years. The decay of DNA, in combination with an enrichment of fulvic acids with increasing depth (FI values), confirms the assumption that DNA can serve as a proxy for the buried OM. Thus, there is not only a gradient of electron acceptors in the replacement horizon but also a gradient of OM quality. This might again facilitate the stratification of active microbial taxa with depth since OM can simultaneously serve as an electron donor and acceptor [46, 47] and because OM quality is known to modulate microbial redox processes [48], with apparent consequences for carbon turnover rates [33, 47].

**The depauperate horizon** This horizon (cluster c, > 14 *cm*) is fairly distinct in many parameters; it features high methane and  $CO_2$  concentrations, a dominance

of archaea, and richness impoverishment. In this zone, the theoretical model of a hierarchical, nested system is clarified (9% vs. 2% relative nestedness in the replacement horizon). At 14 *cm*, the DNA:RNA ratio doubled and archaea replaced bacteria as the dominant microorganisms. We believe this reflects an increase in the number of microbes entering a stationary state below this depth, where cell maintenance overrules cell synthesis due to the low availability of terminal electron acceptors. This is analogous to what has been suggested for cells in low-energy marine environments [26, 28, 49].

The variability in community composition is very low across replicates in this horizon. The system is characterized by the gradual disappearance of taxa with burying age and a richness component steadily increasing to more than 20% (Table 1). If the richness component further increased linearly, it would be the sole factor in structuring the community composition in 1 *m* sediment depth (the total sediment depth of Lake Stechlin is 6 *m*). It is intuitive that the richness component may be a function of the burying time and that it represents the fading signal of preserved organisms. However, it is not clear why it does not follow an exponential decay function that is analogous to that for DNA.

**Potential causes of the high taxa replacement** In our study, many parameters changed rapidly, especially in the replacement horizon (DNA, FI, BPP, electron acceptors), propagating microbial taxa turnover. This could be potentially caused by several different mechanisms: **a)** Cellular turnover: taxa replacement is potentially caused by cell synthesis, lysis, and recycling of dormant cells, which are assumed to be high in sediments [50, 51]. In particular, viral lysis of cells is supposed to be very important in sediments [52, 53]. We found indications for cellular recycling caused by the predatory Bacteriovoracaceae (cf. [54]), which is one of the structuring bacterial lineages identified in Figure S4. Another potential mechanism –one that may be most

important in the depauperate horizon— is differential cell replication. The resources 245  
for cell maintenance and growth should depend on cell size and complexity, which 246  
means that small cells, such as nanoarchaea (e.g., *Candidatus Parvarchaeum*), should 247  
have a selective advantage as they can continue to grow under conditions that cause 248  
other cells to switch to cell maintenance. This could be one explanation for the 249  
observed drop in evenness in the depauperate horizon. **b) Random appearances:** 250  
Replacement might also be caused by the random appearance of taxa due to the 251  
disappearance of others. Since high-throughput sequencing (HTS) produces relative 252  
data, it may superimpose proportions over quantities. For example, the initial decay 253  
of eukaryotes may have opened a niche for previously hidden rare taxa. Further, 254  
if there was no growth in the sediment, lineages that are potentially better suited 255  
for long-term survival than others would appear, such as spore-forming bacteria 256  
(Firmicutes). However, we (and others: [26,31]) did not observe an enrichment of this 257  
lineage in the HTS data with depth (data not shown). In addition, the use of replicate 258  
cores in combination with our conservative stripping (see the Method section) should 259  
have removed most of the random effects. The more or less constant cell numbers 260  
with small local maxima, and the observed shifts in the evenness support a rather 261  
non-random stratification of sediment communities including cell replication. While 262  
the cellular reproduction probably approaches stagnation for most microbes in the 263  
depauperate horizon, the slowly shifting redox conditions during different seasons 264  
and across years may be conducive for the colonization of the replacement horizon by 265  
different niche specialists. The low sedimentation rate of Lake Stechlin (ca. 2 mm per 266  
year, as determined by  $^{137}\text{Cs}$ -dating at the Federal Office for Radiation Protection, 267  
Berlin [courtesy of U.-K. Schkade], or  $0.4 - 2.1 \text{ g} \cdot \text{m}^{-2} \cdot \text{d}^{-1}$ , as determined by sediment 268  
traps [55]) may mitigate this stratification, and the scale of the horizons may look 269  
different in systems with higher or lower sedimentation rates. 270



## Burial processes and microbial activities 271

The microbial sediment community appears to be highly indigenous, yet burial 272  
processes take place simultaneously, and the microbial community itself may eventually 273  
be buried. The buried DNA and organisms seem to preserve historical plankton 274  
communities, which should resemble the past conditions of the lake ecosystem [31, 56, 275  
57]. These past environmental conditions are partly preserved as particulate matter, 276  
which is relatively conservative. We were able to show that these conservative past 277  
parameters still correlate with the overall community. Although past studies have 278  
shown that sediment parameters influence community patterns in marine systems [39], 279  
the respective context data were not separated into present and past, nor was the 280  
microbial community separated into richness and replacement components. In this 281  
context, it is interesting that the richness component can be well explained by the first 282  
two principal components of the past parameters. Since the replacement component 283  
could not be fully mapped by the present parameters in our study, we can assume 284  
that sources of variation other than environmental parameters, in particular, biotic 285  
taxa interactions, are relevant. Strong biotic interactions have been identified in 286  
a vertical profile of a meromictic lake with a comparable chain of redox processes 287  
as they occur in sediments [58]. Deep sediment layers may offer specific energy- 288  
poor microniches favoring a high variety of syntrophic microorganisms [59, 60]. The 289  
Dehalococcoidales (Chlorflexi [61, 62]) and the Miscellaneous Crenarchaeotic Group 290  
(MCG, [63, 64]) are promising candidates for such hybrid forms of energy harvesting 291  
and are both among the most influential lineages in our data (Figure S4). In our 292  
data, the MCG co-occur with Dehalococcoidales, similar to their presence in Lake 293  
Baikal's (> 1500 m water depth) methane hydrate-bearing sediment [65]. Another 294  
indication that biotic interactions are important in Lake Stechlin sediments is the 295  
appearance of the Candidatus Parvarchaeum as a structuring lineage (Figure 2). This 296

lineage can exhibit a cell-to-cell coupling, allowing for thermodynamic processes that 297  
would otherwise not be possible [66]. 298

## Patterns of freshwater archaea 299

The fact that archaea can be very numerous in freshwater sediments and even dominate 300  
microbial communities is a rather new discovery, and hard facts based on comparative 301  
studies are still lacking. Their recovery rate in relation to bacterial sequences or cell 302  
numbers varies between 3–12% ([67], cells), 5–18% ([20], qPCR), and 14–96% ([14], 303  
qPCR), depending on the lake, sampled sediment horizons, and methods employed. In 304  
most cases, only surface sediment samples have been considered (e.g., [68], 1% of cells), 305  
and the few studies involving vertical profiling to date are ambiguous in finding an 306  
archaeal depth gradient. Our results and the cell counts of [67] in Lake Biwa (Japan) 307  
point to an increase in the proportion of archaea with sediment depth. However, the 308  
results obtained by quantitative PCR for Lake Taihu (China; [14]) and Lake Pavin 309  
(France; [20]) fail to show such a relationship. Archaea have, on average, compact 310  
genomes [69] and a lower ribosomal copy number than bacteria [70], which may 311  
lead to underestimates of the actual archaeal abundance. Similar to our results, [20] 312  
found three sequential depth clusters in the archaeal community structure within 313  
the first 40 *cm*, defining an intermediate layer between 4 and 12 *cm*. Next to well 314  
described methanogenic archaea we, similar to the findings of [20], mainly recovered 315  
archaeal lineages with no clear functional assignment thus far, i.e., primarily the MCG 316  
(potentially methanogenic, [64]) and the Marine Benthic Group D (MBG-D). Both 317  
groups are among the most numerous archaea in the marine sub-seafloor, and they 318  
are suspected to metabolize detrital proteins ([19], discussed in more detail below). 319  
Interestingly, we also identified a MCG-B as structuring OTU for the transition zone 320  
(Figure 2), a group which was recently described as eukaryotic progenitor from a 321

hydrothermal vent field (Lokiarchaeota, [71]). Also, several MCG OTUs belonged to 322  
the top structuring taxa. MCG was recently named as Bathyarchaeota by [72] for 323  
its deep-branching phylogeny and its occurrence in deep subsurface environments 324  
—environmental conditions that our cores (30 m water depth and 30 *cm* length) did not 325  
meet. Our results suggest that the specific niche adaptation of these microbes is not 326  
necessarily related or restricted to the deep biosphere but rather to a cellular state of 327  
“low activity” [73]. In this context, it is interesting that single MCG OTU sometimes 328  
dominated the community in the deep horizons (up to 34% in core D at 26 – 30 *cm*), 329  
resulting in a reduced overall evenness and a shift of the residual taxa to the rare 330  
biosphere, contrasting the potential random effects as discussed above. Another 331  
intriguing observation is the considerable overlap of archaeal and partially bacterial 332  
lineages between our study and deep-sea environments. Consequently, typical marine 333  
lineages (e.g., archaea in Figure S1: MGI, MCG [Bathyarchaeota], MHVG, DHVEG-1, 334  
-6 [Woesearchaeota], DSEG, MBG-A, -B [Lokiarchaeota], -D, -E) are not as “marine” 335  
or as “deep-sea” as previously thought. Given the high cost of deep-sea research [28], 336  
freshwater sediments might literally pose a row-boat alternative for research questions 337  
targeting these “remote” and “extremophile” microorganisms. 338

## Summary and Conclusions 339

Our results point toward a steady-state chemostat-like environment with a highly 340  
stratified indigenous microbial community in freshwater sediments. Sediments are 341  
neither a one-way system for the burial of organic matter nor purely composed of 342  
redox-active microorganisms. Both processes take place alongside a vertical gradient 343  
of electron acceptors and decomposing OM of decreasing quality. The microbial 344  
community is highly structured into distinct zones, matching most sediment param- 345  
eters. Both the microbial community and the sediment parameters can be divided 346

into components relevant for burial and past conditions as well as for recent carbon 347  
turnover processes and their context data. Biotic interactions are likely to play an 348  
important role, and we were able to identify important sediment taxa for each horizon. 349  
We put a spotlight on the largely unexplored freshwater sediments and confirmed 350  
earlier findings that were previously described only for marine sediments, such as the 351  
importance of marine archaeal lineages and the introduction of a depauperation zone 352  
in which the burial process becomes increasingly important. 353

## Materials and Methods 354

### Sampling site and sampling procedures 355

Lake Stechlin (latitude 53°10 N, longitude 13°02 E) is a dimictic meso-oligotrophic 356  
lake (maximum depth 69.5 *m*; area 4.23 *km*<sup>2</sup>) in northern Germany that has been 357  
the subject of more than 55 years of research [74]. Sediment cores were extracted 358  
from the southern bay of the lake. Four adjacent sites were sampled to account for 359  
spatial heterogeneity in the sediment (Sites A-D, Fig. S6). Pore water was collected 360  
by four in-situ dialysis samplers, so-called “peepers” [75], which were deployed for 361  
14 days using a frame (1 *m*<sup>2</sup>). Shortly before retrieving the peepers, four sediment 362  
cores were taken from each site with Perspex tubes (inner diameter: 6 or 9 *cm*; 363  
length: 60 *cm*) using gravity corers (UWITEC™, Mondsee, Austria) at 30 *m* water 364  
depth (aphotic depth) on two subsequent days (March 26 and 28, 2012; peepers were 365  
retrieved on April 1, 2012). Two sediment cores (6 *cm* diameter) were stored in the 366  
dark at 4°C until oxygen penetration depth was measured within the next 4 hours 367  
(see below). The sediments of the 9 *cm* cores were sliced directly into 1 *cm* layers for 368  
the uppermost 10 *cm*, then in 4 *cm* layers for sediment depths of 10 – 30 *cm*. One 369  
core was used for the analysis of the total sediment and the other was used for pore 370

water, gas, and microbial analyses (see below). In May 2014, 24 additional cores were  
taken to determine the age-depth correlation using the cesium 137 technique.

## Maximum oxygen penetration depth

Two initial cores were carefully transferred into 20 *cm* short cores without disturbing  
the sediment surface. The short cores were kept cool (4°C) until measurements were  
taken. Oxygen microprofiles were performed using two Clark-type microelectrodes  
(OX50 oxygen microsensors, Unisense, Aarhus, Denmark) with a 50  $\mu\text{m}$  glass tip.  
SensorTracePro 2.0 software (Unisense) was used for data storage. The electrodes  
were calibrated by two-point calibration. For each core, we measured at least four  
profiles. The sediment-water interface was defined as the point where the oxygen  
depletion shifted from linear to non-linear [76].

## Pore water analysis

The sampled sediment horizons were centrifuged (13,250 g for 10 min) to retrieve  
pore water (filtered through rinsed 0.45  $\mu\text{m}$  cellulose acetate membranes, Roth,  
Germany) for immediate analysis of the dissolved organic carbon (DOC) and FI.  
DOC was measured as non-purgeable organic carbon with an organic carbon analyzer  
(multi N/C 3100, Analytic Jena AG, Jena, Germany). FI was measured following  
the protocol of [34]. Peeper samples were analyzed for concentrations of SRP and  
ammonium ( $\text{NH}_4^+$ ), dissolved iron ( $\text{Fe}^{2+/3+}$ ), manganese ( $\text{Mn}^{2+}$ ), chloride ( $\text{Cl}^-$ ),  
nitrate ( $\text{NO}_3^-$ ), and sulfate ( $\text{SO}_4^{2-}$ ), following DIN EN ISO 10304-1. SRP and  $\text{NH}_4^+$   
were photometrically determined using a segmented flow analysis (SFA, Skalar Sanplus,  
Skalar Analytical B.V., De Breda, Netherlands). Dissolved iron and manganese  
levels were determined by AAS (Perkin Elmer 3300, Rodgau-Juegesheim, Germany),  
and analyses of the dissolved anions nitrate and sulfate were conducted by ion

chromatography (IC, Shimadzu Corporation, Japan). 395

## Total sediment analysis 396

Sediment water content was analyzed by drying at 85°C until mass was constant. 397  
A subsample was used to determine the organic matter content (4 h at 550°C) of 398  
the sediment. The metal concentrations were determined by ICP-OES (iCAP 6000, 399  
Thermo Fisher Scientific, Dreieich, Germany) after aqua regia digestion in a microwave 400  
oven (Gigatherm, Grub, Switzerland), and total phosphorus (TP) was determined by 401  
CARY 1E (Varian Deutschland GmbH, Darmstadt, Germany) after  $H_2SO_4/H_2O_2$  402  
digestion (150°C, 16 h). CNHS content was determined using aliquots of dried matter 403  
in a vario EL system (Elementar Analysensysteme GmbH, Hanau, Germany). 404

## Gas chromatography 405

From each depth, 2 ml of sediment was transferred into 10 ml vials filled with 4 ml 406  
of distilled water. Samples were fixed with mercury chloride (final conc. 200  $mg\,l^{-1}$ ), 407  
sealed, and stored in the dark at 4°C until analysis. Concentrations of  $CO_2$ ,  $CH_4$ , 408  
and  $N_2O$  were measured by gas chromatography (Shimadzu GC-14B, Kyoto, Japan) 409  
using the headspace technique described in [77]. 410

## Bacterial protein production 411

Bacterial biomass production was determined via  $^{14}C$  leucine incorporation at in 412  
situ temperature under anoxic conditions [78] using a modified protocol [79]. 500  $\mu l$  413  
of sediment was diluted 1:1 with sterile filtered supernatant water and incubated 414  
with  $^{14}C$ -leucine (Hartmann Analytics, Braunschweig, Germany; specific activity: 415  
306  $mCi\,mmol^{-1}$ , diluted with cold L-leucine to a final concentration of 50  $\mu mol\,l^{-1}$ ). 416  
Incubations were stopped after 1 h, extracted, and measured in a liquid scintillation 417

analyzer (TriCarb 2810 TR, PerkinElmer Inc., Germany). Disintegrations per minute 418  
were converted to pmol leucine  $ml^{-1}day^{-1}$ , assuming a two-fold intracellular isotope 419  
dilution [80,81]. 420

## Cell counting 421

Sediment subsamples for cell counting were immediately fixed with ethanol (50% v/v 422  
final concentration). Prior to analysis, samples were shaken for 1 h at 700 rpm on a 423  
thermoshaker and were sonicated three times for 20s at 5 – 6W (Branson Sonifier 150, 424  
Danbury, USA). Cells were stained with a SYBR Gold staining solution diluted to 425  
1:1,000 (Molecular Probes, Eugene, USA) and were counted with an epifluorescence 426  
microscope (Zeiss, Axio Imager. Z1, Jena, Germany). 427

## Nucleic acid extraction and sequencing 428

To determine the DNA:RNA ratio, we extracted total nucleic acids using a phenol- 429  
chloroform protocol from 200 – 400  $\mu l$  sediment, as described by [82]. The DNA:RNA 430  
ratio was measured via fluorometry using selectively binding dyes (Broad range 431  
dsDNA and broad range RNA assay Kit, Life technologies, Darmstadt, Germany) 432  
developed for the Qubit 2.0 (Life technologies, Darmstadt, Germany). A second 433  
extraction served as template for the sequencing and determination of the total DNA 434  
content. A defined sediment subsample (350 $\mu l$ ) from each depth was lyophilized prior 435  
to DNA extraction. We used the “Alternative Protocol for Maximum DNA yields” 436  
of the UltraClean® Soil DNA Isolation Kit (MoBio Laboratories Inc., Carlsbad, 437  
USA). The quality of the DNA and the presence of putative environmental (small) 438  
DNA in 12 representative samples from 12 depths were verified with a microgel 439  
electrophoresis system (DNA High Sensitivity Kit, Bioanalyzer, Agilent, USA, see 440  
Fig. S7). A total of 5 – 20 ng of DNA, as measured by NanoPhotometer P300 441

(Implen, Schatzbogen, Germany), served as the template for PCR amplification 442  
(Herculase II system, Life Technologies) using a single universal primer system (926F, 443  
1392R, [83]). The primer pair employed is one important feature of our study in that 444  
it detects all three microbial domains (archaea, bacteria, and eukaryotes) in freshwater 445  
systems [58,84]. PCR products were purified with AMPure Beads (Beckmann Coulter, 446  
Brea, USA) and quantified and pooled using a PicoGreen assay (Life Technologies, 447  
Carlsbad, USA). High-throughput sequencing was performed in a Roche 454 GS 448  
Junior benchtop sequencer (Hoffmann-La Roche, Basel, Switzerland) at the Berlin 449  
Center for Genomics in Biodiversity Research. Raw sequence data were deposited in 450  
ENA (accession PRJEB14189). 451

## Data processing 452

454 sequencing data were processed using Mothur (version 1.33.0) following the 453  
guidelines of the Mothur SOP ([http://www.mothur.org/wiki/454\\_SOP](http://www.mothur.org/wiki/454_SOP), accessed 454  
02/2014) with the following modifications: (i) for quality trimming, we used a sliding 455  
window approach with a relaxed threshold (window size: 50, quality cut-off: 27), and 456  
(ii) the alignment step used SINA (version 1.2.11; [85]) against the SILVA v.111 non- 457  
redundant SSU reference database. A total of 396,000 reads (49% of raw sequences) 458  
were retained. The sequences were clustered into OTUs at 97% sequence similarity. 459  
A representative sequence from each OTU was used for taxonomic classification with 460  
the least common ancestor method in SINA, using 0.7 as a setting for minimum 461  
similarity as well as for lca-quorum. The classified OTU abundance matrix served as 462  
the basis for all subsequent statistical analyses. The percentage of sequences with 463  
low similarity (< 93%) to the next reference sequence was determined by submitting 464  
the fasta files to SILVA NGS [86]. 465



## Statistics

466

All measured environmental parameters were compiled in a matrix and imported  
into R (<http://cran.r-project.org/>, version 3.2.2). We replaced two outliers (FI:  
replicate 4 *cm*, total phosphorous: replicate 14 *cm*) with the mean values of the  
three other sediment cores. Similarly, the 30 *cm* peeper data from replicate core  
B were missing and replaced by the mean of the residual replicates. For statistical  
analysis, the relative proportions of archaea, bacteria, and eukaryotes were arc-sin  
transformed. For the multiple regression analysis on the declining DNA concentrations,  
we removed one value (replicate 3, 22 *cm*) to meet the normal distribution criteria of  
the residuals. Sufficient normal distribution was confirmed by a QQ plot and Shapiro-  
Wilks test,  $p = 0.183$ ; Cook's distance was not violated in any case. We categorized  
the environmental parameters into present ( $CH_4$ ,  $CO_2$ , DOC, BPP, SRP,  $NH_4^+$ ,  
 $SO_4^{2-}$ ,  $Cl^-$ ,  $Fe^{2+/3+}$ ,  $Mn^{2+}$ , FI, and RNA:DNA) and past (TC, TN, dry-weight, TP,  
TS, TH, Al, As, Ca, Cu, Fe, Mg, Mn, Pb, Ti, and Zn) (see Box 1) and assessed the  
sample variation for each subset by a centered, scaled principal component analysis  
(PCA, see Fig. S8). The resulting most explanatory PCA axes, which explained 54%  
(present parameters) and 41% (past parameters) of the sample variation, were used  
in the community statistics (see below). DNA and cell numbers were not categorized  
due to their ambiguous nature; Al was used as a substitute for Mg and Ti due to  
their high degree of correlation ( $r > 0.95$ );  $N_2O$ ,  $NO_3^-$ , Cd, and Co were excluded  
due to their very low values, i.e., near or below the detection limit in all the samples.

## Community statistics

487

Random effects were initially excluded from the OTU matrix by removing all OTUs  
present in only one sample, regardless of the number of reads. The random effects are  
expected to be very high in sediments due to the burial of random organic matter (e.g.,

caused by the droppings of a bird, tourist activities, rainfall) and thus a large amount of  
rare taxa. This reduced the number of OTUs from 29,228 to 9,581 but did not influence  
the sample distances (Mantel test with Hellinger distances:  $r = 0.993, p < 0.001$ ).  
Diversity indices were calculated using the vegan package [87] for R, with a community  
matrix that was rarefied to the lowest number of reads (642) present in a sample.  
The rarefied matrix was highly correlated to the initial matrix (Mantel test with  
Hellinger distances:  $r = 0.923, p < 0.001$ ). Nonmetric multidimensional scaling  
(NMDS) and Mantel tests were based on a Hellinger-transformed OTU matrix with  
Euclidean distances. The PCA scores from the past and present parameters (see Box  
1) were fitted into the NMDS, and their correlation with the underlying distance  
matrix was tested with a Mantel test. We used a fuzzy set ordination [88] to test  
for the influence of the past and present parameters on the separated richness and  
replacement community components. For this, we partitioned  $\beta$ -diversity into richness  
and replacement components using indices from the Jaccard family, following [89] and  
the functions provided by [35]. In order to identify general vertical patterns, we used  
a sum table to increase the resolution and thus avoid an artificial increase in turnover  
versus the richness/nestedness structure due to sampling effects. The sum table  
was generated by summing up 2,000 sequences per depth, if applicable. The final  
sum table was rarefied to the lowest number of sequences in the depth profile (5,987  
reads). The cluster analysis (UPGMA clustering based on Kulczynski distance, Fig.  
1) was also done on the sum table. The depth-dependent nestedness [29], richness  
component, replacement component, SCBD, and LCBD were calculated as described  
in [35]. We note that the nestedness index [29] is dependent on the sample size, and  
so we refer to it as “relative nestedness.”

|                                                                                       |     |
|---------------------------------------------------------------------------------------|-----|
| <b>Acknowledgments</b>                                                                | 515 |
| We thank Michael Sachtleben and Federica Pinto for their help during sampling.        | 516 |
| We also thank Elke Mach, Uta Mallok, Christiane Herzog, Hans-Jürgen Exner, Grit       | 517 |
| Siegert, Susan Mbedi, Kirsten Richter, Camila Mazzoni and Andreas Kleeberg for their  | 518 |
| assistance and measurements in the laboratory and Henrik R. Nilsson for comments      | 519 |
| on this manuscript. This is publication 40 of the Berlin Center for Genomics in       | 520 |
| Biodiversity Research. This work was funded by the Leibniz Association Pakt for       | 521 |
| Research and Innovation project “Climate-driven changes in biodiversity of microbiota | 522 |
| - TemBi” (SAW-2011-IGB-2) and DFG GR1540/15-1 and 23-1. We thank U.-W.                | 523 |
| Schkade (Federal Office for Radiation Protection, Berlin, Germany) for the dating of  | 524 |
| the Lake Stechlin sediments.                                                          | 525 |

## References

1. L. J. Tranvik, J. a. Downing, J. B. Cotner, S. a. Loiselle, R. G. Striegl, T. J. Ballatore, P. Dillon, K. Finlay, K. Fortino, and L. B. Knoll, “Lakes and reservoirs as regulators of carbon cycling and climate,” *Limnology and Oceanography*, vol. 54, no. 6-part\_2, pp. 2298–2314, 2009.
2. W. E. & G. Dean E., “Magnitude and Significance of Carbon Burial in Lakes, Reservoirs, and Peatlands,” *Geology*, vol. 26, no. 6, pp. 535–538, 1998.
3. D. Bastviken, L. J. Tranvik, J. A. Downing, P. M. Crill, and A. Enrich-Prast, “Freshwater Methane Emissions Offset the Continental Carbon Sink,” *Science*, vol. 331, no. 6013, pp. 50–50, 2011.

4. H. Fischer, A. Sachse, C. E. W. Steinberg, and M. Pusch, “Differential retention and utilization of dissolved organic carbon by bacteria in river sediments,” *Limnology and Oceanography*, vol. 47, no. 6, pp. 1702–1711, 2002.
5. A. L. Haglund, P. Lantz, E. Törnblom, and L. Tranvik, “Depth distribution of active bacteria and bacterial activity in lake sediment,” *FEMS Microbiology Ecology*, vol. 46, no. 1, pp. 31–38, 2003.
6. K. H. Nealson, “SEDIMENT BACTERIA: Who’s There, What Are They Doing, and What’s New?,” *Annu. Rev. Earth Planet. Sci.*, vol. 25, no. 1, pp. 403–34, 1997.
7. J. P. Megonigal, M. E. Hines, and P. T. Visscher, “Anaerobic Metabolism: Linkages to Trace Gases and Aerobic Processes,” in *Biogeochemistry*, pp. 317–424, Oxford: Elsevier, 2004.
8. M. Maerki, B. Muller, C. Dinkel, and B. Wehrli, “Mineralization pathways in lake sediments with different oxygen and organic carbon supply,” *Limnology and Oceanography*, vol. 54, no. 2, p. 428, 2009.
9. E. D. Melton, E. D. Swanner, S. Behrens, C. Schmidt, and A. Kappler, “The interplay of microbially mediated and abiotic reactions in the biogeochemical Fe cycle,” *Nature Reviews Microbiology*, vol. 12, no. 12, pp. 797–808, 2014.
10. K. Frindte, M. Allgaier, H.-P. Grossart, and W. Eckert, “Microbial Response to Experimentally Controlled Redox Transitions at the Sediment Water Interface,” *PLOS ONE*, vol. 10, p. e0143428, nov 2015.
11. K. G. Lloyd, L. Schreiber, D. G. Petersen, K. U. Kjeldsen, M. a. Lever, A. D. Steen, R. Stepanauskas, M. Richter, S. Kleindienst, S. Lenk, A. Schramm, and

- B. B. Jørgensen, "Predominant archaea in marine sediments degrade detrital proteins," *Nature*, vol. 496, no. 7444, pp. 215–8, 2013.
12. I. Miskin, G. Rhodes, K. Lawlor, J. R. Saunders, and R. W. Pickup, "Bacteria in post-glacial freshwater sediments," *Microbiology*, vol. 144, no. 9, pp. 2427–2439, 1998.
13. S. Li, X. Xiao, X. Yin, and F. Wang, "Bacterial community along a historic lake sediment core of Ardley Island, west Antarctica," *Extremophiles : life under extreme conditions*, vol. 10, no. 5, pp. 461–7, 2006.
14. W. Ye, X. Liu, S. Lin, J. Tan, J. Pan, D. Li, and H. Yang, "The vertical distribution of bacterial and archaeal communities in the water and sediment of Lake Taihu," *FEMS Microbiology Ecology*, vol. 70, no. 2, pp. 263–276, 2009.
15. A. Vuillemin and D. Ariztegui, "Geomicrobiological investigations in subsaline maar lake sediments over the last 1500 years," *Quaternary Science Reviews*, vol. 71, pp. 119–130, 2013.
16. W. Xiong, P. Xie, S. Wang, Y. Niu, X. Yang, and W. Chen, "Sources of organic matter affect depth-related microbial community composition in sediments of Lake Erhai, Southwest China," *Journal of Limnology*, vol. 74, no. 2, pp. 310–323, 2015.
17. S. Spring, R. Schulze, J. Overmann, and K. H. Schleifer, "Identification and characterization of ecologically significant prokaryotes in the sediment of freshwater lakes: Molecular and cultivation studies," *FEMS Microbiology Reviews*, vol. 24, no. 5, pp. 573–590, 2000.

18. C. Bri  e, D. Moreira, and P. L  pez-Garc  a, “Archaeal and bacterial community composition of sediment and plankton from a suboxic freshwater pond,” *Research in Microbiology*, vol. 158, no. 3, pp. 213–227, 2007.
19. K. G. Lloyd, M. K. May, R. T. Kevorkian, and A. D. Steen, “Meta-analysis of quantification methods shows that archaea and bacteria have similar abundances in the subseafloor,” *Applied and Environmental Microbiology*, vol. 79, no. 24, pp. 7790–7799, 2013.
20. G. Borrel, A. C. Lehours, O. Crouzet, D. J  z  quel, K. Rockne, A. Kulczak, E. Duffaud, K. Joblin, and G. Fonty, “Stratification of Archaea in the deep sediments of a freshwater meromictic lake: Vertical shift from methanogenic to uncultured Archaeal lineages,” *PLoS ONE*, vol. 7, no. 8, p. 8, 2012.
21. J. Zhang, Y. Yang, L. Zhao, Y. Li, S. Xie, and Y. Liu, “Distribution of sediment bacterial and archaeal communities in plateau freshwater lakes,” *Applied Microbiology and Biotechnology*, vol. 99, no. 7, pp. 3291–3302, 2015.
22. T. Rodrigues, E. Cat  o, M. M. C. Bustamante, B. F. Quirino, R. H. Kruger, and C. M. Kyaw, “Seasonal effects in a lake sediment archaeal community of the Brazilian Savanna,” *Archaea (Vancouver, B.C.)*, vol. 2014, p. 957145, 2014.
23. R. G  chter, J. S. Meyer, and A. Mares, “Contribution of bacteria to release and fixation of phosphorus in lake sediments,” *Limnology and Oceanography*, vol. 33, no. 6\_part\_2, pp. 1542–1558, 1988.
24. O. C. Chan, P. Claus, P. Casper, A. Ulrich, T. Lueders, and R. Conrad, “Vertical distribution of structure and function of the methanogenic archaeal

- community in Lake Dagow sediment,” *Environmental Microbiology*, vol. 7, no. 8, pp. 1139–1149, 2005.
25. P. N. Polymenakou, G. Fragkioudaki, and A. Tselepides, “Bacterial and organic matter distribution in the sediments of the Thracian Sea (NE Aegean Sea),” *Continental Shelf Research*, vol. 27, no. 17, pp. 2187–2197, 2007.
26. B. A. Lomstein, A. T. Langerhuus, S. D’Hondt, B. B. Jørgensen, and A. J. Spivack, “Endospore abundance, microbial growth and necromass turnover in deep sub-seafloor sediment,” *Nature*, vol. 484, no. 7392, pp. 101–104, 2012.
27. S. Xie, J. S. Lipp, G. Wegener, T. G. Ferdelman, and K.-u. Hinrichs, “Turnover of microbial lipids in the deep biosphere and growth of benthic archaeal populations,” *Proceedings of the National Academy of Sciences of the United States of America*, vol. 110, no. 15, pp. 6010–4, 2013.
28. T. M. Hoehler and B. B. Jørgensen, “Microbial life under extreme energy limitation,” *Nature reviews. Microbiology*, vol. 11, no. 2, pp. 83–94, 2013.
29. A. Baselga, “Partitioning the turnover and nestedness components of beta diversity,” *Global Ecology and Biogeography*, vol. 19, no. 1, pp. 134–143, 2010.
30. C. Corinaldesi, F. Beolchini, and A. Dell’Anno, “Damage and degradation rates of extracellular DNA in marine sediments: Implications for the preservation of gene sequences,” *Molecular Ecology*, vol. 17, no. 17, pp. 3939–3951, 2008.
31. T. Wunderlin, J. P. Corella, T. Junier, M. Bueche, J. L. Loizeau, S. Girardclos, and P. Junier, “Endospore-forming bacteria as new proxies to assess impact of eutrophication in Lake Geneva (Switzerland-France),” *Aquatic Sciences*, vol. 76, no. S1, pp. 103–116, 2014.

32. P. A. Meyers and R. Ishiwatari, “Lacustrine organic geochemistry - an overview of indicators of organic-matter sources and diagenesis in lake-sediments,” *Organic Geochemistry*, vol. 20, no. 7, pp. 867–900, 1993.
33. S. Arndt, B. B. Jørgensen, D. E. LaRowe, J. J. Middelburg, R. D. Pancost, and P. Regnier, “Quantifying the degradation of organic matter in marine sediments: A review and synthesis,” *Earth-science reviews*, vol. 123, pp. 53–86, 2013.
34. D. M. McKnight, E. W. Boyer, P. K. Westerhoff, P. T. Doran, T. Kulbe, and D. T. Andersen, “Spectrofluorometric characterization of dissolved organic matter for indication of precursor organic material and aromaticity,” *Limnology and Oceanography*, vol. 46, no. 1, pp. 38–48, 2001.
35. P. Legendre, “Interpreting the replacement and richness difference components of beta diversity,” *Global Ecology and Biogeography*, vol. 23, no. 11, pp. 1324–1334, 2014.
36. J. Comte, E. S. Lindström, A. Eiler, and S. Langenheder, “Can marine bacteria be recruited from freshwater sources and the air?,” *The ISME journal*, vol. 8, no. 12, pp. 1–8, 2014.
37. D. G. Capone and R. P. Kiene, “Comparison of microbial dynamics in marine and freshwater sediments: Contrasts in anaerobic carbon catabolism,” *Limnology and Oceanography*, vol. 33, no. 4, pp. 725–749, 1988.
38. G. M. Luna, C. Corinaldesi, E. Rastelli, and R. Danovaro, “Patterns and drivers of bacterial alpha- and beta-diversity across vertical profiles from surface to subsurface sediments,” *Environmental Microbiology Reports*, vol. 5, no. 5, pp. 731–739, 2013.



39. S. L. Jørgensen, B. Hannisdal, A. Lanzén, T. Baumberger, K. Flesland, R. Fonseca, L. Ovreås, I. H. Steen, I. H. Thorseth, R. B. Pedersen, and C. Schleper, “Correlating microbial community profiles with geochemical data in highly stratified sediments from the Arctic Mid-Ocean Ridge,” *Proceedings of the National Academy of Sciences of the United States of America*, vol. 109, no. 42, pp. E2846–55, 2012.
40. Y. Koizumi, H. Kojima, and M. Fukui, “Characterization of depth-related microbial community structure in lake sediment by denaturing gradient gel electrophoresis of amplified 16S rDNA and reversely transcribed 16S rRNA fragments,” *FEMS Microbiology Ecology*, vol. 46, no. 2, pp. 147–157, 2003.
41. H. Sass, H. Cypionka, and H.-D. Babenzien, “Vertical distribution of sulfate-reducing bacteria at the oxic-anoxic interface in sediments of the oligotrophic lake stechlin,” *FEMS Microbiology Ecology*, vol. 22, no. 3, pp. 245–255, 1997.
42. J. S. Deutzmann, P. Stief, J. Brandes, and B. Schink, “Anaerobic methane oxidation coupled to denitrification is the dominant methane sink in a deep lake,” *Proceedings of the National Academy of Sciences of the United States of America*, vol. 111, no. 51, pp. 18273–8, 2014.
43. F. Thevenon, N. D. Graham, M. Chiaradia, P. Arpagaus, W. Wildi, and J. Poté, “Local to regional scale industrial heavy metal pollution recorded in sediments of large freshwater lakes in central Europe (lakes Geneva and Lucerne) over the last centuries,” *Science of the Total Environment*, vol. 412-413, pp. 239–247, 2011.
44. T. Treude, S. Krause, J. Maltby, A. W. Dale, R. Coffin, and L. J. Hamdan, “ScienceDirect Sulfate reduction and methane oxidation activity below the sulfate-methane transition zone in Alaskan Beaufort Sea continental margin

- sediments : Implications for deep sulfur cycling,” *Geochimica et Cosmochimica Acta*, vol. 144, pp. 217–237, 2014.
45. R. Conrad, P. Claus, and P. Casper, “Characterization of stable isotope fractionation during methane production in the sediment of a eutrophic lake, Lake Dagow, Germany,” *Limnology and Oceanography*, vol. 54, no. 2, pp. 457–471, 2009.
  46. D. R. Lovley, J. D. Coates, E. L. Blunt-Harris, E. J. P. Phillips, and J. C. Woodward, “Humic substances as electron acceptors for microbial respiration,” *Nature*, vol. 382, pp. 445–448, aug 1996.
  47. I. C. Torres, K. S. Inglett, and K. R. Reddy, “Heterotrophic microbial activity in lake sediments: Effects of organic electron donors,” *Biogeochemistry*, vol. 104, no. 1-3, pp. 165–181, 2011.
  48. C. Glombitza, M. Stockhecke, C. J. Schubert, A. Vetter, and J. Kallmeyer, “Sulfate reduction controlled by organic matter availability in deep sediment cores from the saline, alkaline lake van (Eastern Anatolia, Turkey),” *Frontiers in Microbiology*, vol. 4, no. JUL, p. 209, 2013.
  49. R. J. Parkes, B. Cragg, E. Roussel, G. Webster, A. Weightman, and H. Sass, “A review of prokaryotic populations and processes in sub-seafloor sediments, including biosphere: Geosphere interactions,” *Marine Geology*, vol. 352, pp. 409–425, 2014.
  50. G. M. Luna, E. Manini, and R. Danovaro, “Large Fraction of Dead and Inactive Bacteria in Coastal Marine Sediments: Comparison of Protocols for Determination and Ecological Significance,” *Applied and Environmental Microbiology*, vol. 68, pp. 3509–3513, jul 2002.

51. R. Danovaro, A. Dell'Anno, C. Corinaldesi, M. Magagnini, R. Noble, C. Tamburini, and M. Weinbauer, "Major viral impact on the functioning of benthic deep-sea ecosystems.," *Nature*, vol. 454, no. 7208, pp. 1084–1087, 2008.
52. T. Engelhardt, J. Kallmeyer, H. Cypionka, and B. Engelen, "High virus-to-cell ratios indicate ongoing production of viruses in deep subsurface sediments.," *The ISME journal*, vol. 8, no. 7, pp. 1–7, 2014.
53. A. Dell'Anno, C. Corinaldesi, and R. Danovaro, "Virus decomposition provides an important contribution to benthic deep-sea ecosystem functioning.," *Proceedings of the National Academy of Sciences*, vol. 112, no. 16, pp. E2014–E2019, 2015.
54. P. P. Kandel, Z. Pasternak, J. van Rijn, O. Nahum, and E. Jurkevitch, "Abundance, diversity and seasonal dynamics of predatory bacteria in aquaculture zero discharge systems," *FEMS Microbiology Ecology*, vol. 89, no. 1, pp. 149–161, 2014.
55. A. Fuchs, G. B. Selmeczy, P. Kasprzak, J. Padisák, and P. Casper, "Coincidence of sedimentation peaks with diatom blooms, wind, and calcite precipitation measured in high resolution by a multi-trap," *Hydrobiologia*, vol. 763, no. 1, pp. 329–344, 2016.
56. I. Domaizon, O. Savichtcheva, D. Debroas, F. Arnaud, C. Villar, C. Pignol, B. Alric, and M. E. Perga, "DNA from lake sediments reveals the long-term dynamics and diversity of *Synechococcus* assemblages," *Biogeosciences Discussions*, vol. 10, no. 2, pp. 2515–2564, 2013.

57. E. Capo, D. Debroas, F. Arnaud, and I. Domaizon, “Is Planktonic Diversity Well Recorded in Sedimentary DNA? Toward the Reconstruction of Past Protistan Diversity,” *Microbial Ecology*, vol. 70, no. 4, pp. 865–875, 2015.
58. E. A. Gies, K. M. Konwar, J. Thomas Beatty, and S. J. Hallam, “Illuminating microbial dark matter in meromictic Sakinaw Lake,” *Applied and Environmental Microbiology*, vol. 80, no. 21, pp. 6807–6818, 2014.
59. L. Adrian, U. Szewzyk, J. Wecke, and H. Görisch, “Bacterial dehalorespiration with chlorinated benzenes,” *Nature*, vol. 408, no. November, pp. 580–583, 2000.
60. M. Ferrer, M. E. Guazzaroni, M. Richter, A. García-Salamanca, P. Yarza, A. Suárez-Suárez, J. Solano, M. Alcaide, P. van Dillewijn, M. A. Molina-Henares, N. López-Cortés, Y. Al-Ramahi, C. Guerrero, A. Acosta, L. I. de Eugenio, V. Martínez, S. Marques, F. Rojo, E. Santero, O. Genilloud, J. Pérez-Pérez, R. Rosselló-Móra, and J. L. Ramos, “Taxonomic and Functional Metagenomic Profiling of the Microbial Community in the Anoxic Sediment of a Sub-saline Shallow Lake (Laguna de Carrizo, Central Spain),” *Microbial Ecology*, vol. 62, pp. 824–837, nov 2011.
61. A. Hiraishi, “Biodiversity of dehalorespiring bacteria with special emphasis on polychlorinated biphenyl/dioxin dechlorinators,” *Microbes and Environments*, vol. 23, no. 1, pp. 1–12, 2008.
62. L. a. Hug, C. J. Castelle, K. C. Wrighton, B. C. Thomas, I. Sharon, K. R. Frischkorn, K. H. Williams, S. G. Tringe, and J. F. Banfield, “Community genomic analyses constrain the distribution of metabolic traits across the Chloroflexi phylum and indicate roles in sediment carbon cycling,” *Microbiome*, vol. 1, no. 1, p. 22, 2013.

63. K. B. Sørensen and A. Teske, “Stratified Communities of Active Archaea in Deep Marine Subsurface Sediments Stratified Communities of Active Archaea in Deep Marine Subsurface Sediments,” *Appl Environ Microbiol*, vol. 72, no. 7, pp. 4596–4603, 2006.
64. P. N. Evans, D. H. Parks, G. L. Chadwick, S. J. Robbins, V. J. Orphan, S. D. Golding, and G. W. Tyson, “Methane metabolism in the archaeal phylum Bathyarchaeota revealed by genome-centric metagenomics.,” *Science (New York, N.Y.)*, vol. 350, no. 6259, pp. 434–8, 2015.
65. V. V. Kadnikov, A. V. Mardanov, A. V. Beletsky, O. V. Shubenkova, T. V. Pogodaeva, T. I. Zemskaya, N. V. Ravin, and K. G. Skryabin, “Microbial community structure in methane hydrate-bearing sediments of freshwater Lake Baikal,” *FEMS Microbiology Ecology*, vol. 79, no. 2, pp. 348–358, 2012.
66. B. J. Baker, L. R. Comolli, G. J. Dick, L. J. Hauser, D. Hyatt, B. D. Dill, M. L. Land, N. C. VerBerkmoes, R. L. Hettich, and J. F. Banfield, “Enigmatic, ultrasmall, uncultivated Archaea,” *Proceedings of the National Academy of Sciences*, vol. 107, pp. 8806–8811, may 2010.
67. Y. Koizumi, S. Takii, M. Nishino, and T. Nakajima, “Vertical distributions of sulfate-reducing bacteria and methane-producing archaea quantified by oligonucleotide probe hybridization in the profundal sediment of a mesotrophic lake,” *FEMS Microbiology Ecology*, vol. 44, no. 1, pp. 101–108, 2003.
68. J. I. K. Schwarz, W. Eckert, and R. Conrad, “Community structure of Archaea and Bacteria in a profundal lake sediment Lake Kinneret (Israel),” *Systematic and Applied Microbiology*, vol. 30, no. 3, pp. 239–254, 2007.

69. E. V. Koonin and Y. I. Wolf, “Genomics of bacteria and archaea: The emerging dynamic view of the prokaryotic world,” *Nucleic Acids Research*, vol. 36, no. 21, pp. 6688–6719, 2008.
70. F. E. Angly, P. G. Dennis, A. Skarszewski, I. Vanwonterghem, P. Hugenholtz, and G. W. Tyson, “CopyRighter: a rapid tool for improving the accuracy of microbial community profiles through lineage-specific gene copy number correction.,” *Microbiome*, vol. 2, no. 1, p. 11, 2014.
71. A. Spang, J. H. Saw, S. L. Jørgensen, K. Zaremba-Niedzwiedzka, J. Martijn, A. E. Lind, R. van Eijk, C. Schleper, L. Guy, and T. J. Ettema, “Complex archaea that bridge the gap between prokaryotes and eukaryotes,” *Nature*, vol. 521, no. 7551, pp. 173–179, 2015.
72. J. Meng, J. Xu, D. Qin, Y. He, X. Xiao, and F. Wang, “Genetic and functional properties of uncultivated MCG archaea assessed by metagenome and gene expression analyses.,” *The ISME journal*, vol. 8, no. 3, pp. 650–9, 2014.
73. K. Kubo, K. G. Lloyd, J. F Biddle, R. Amann, A. Teske, and K. Knittel, “Archaea of the Miscellaneous Crenarchaeotal Group are abundant, diverse and widespread in marine sediments,” *The ISME Journal*, vol. 6, no. 10, pp. 1949–1965, 2012.
74. R. Koschel and D. Adams, “An approach to understanding a temperate oligotrophic lowland lake (lake stechlin, germany),” *Archiv fur Hydrobiologie, Special Issues Advanced Limnology*, vol. 58, pp. 1–9, 2003.
75. R. H. Hesslein, “An in situ sampler for close interval pore water studies,” *Limnology and Oceanography*, vol. 21, no. 6, pp. 912–914, 1976.

76. R. N. Glud, “Oxygen dynamics of marine sediments,” *Marine Biology Research*, vol. 4, no. 4, pp. 243–289, 2008.
77. P. Casper, M. Bianchi, and H. Muntau, “Spatial and temporal variations of heavy metals in the sediments of Lake Stechlin (Germany),” *Limnologica*, vol. 25, no. 4, pp. 301–309, 1995.
78. N. Buesing and M. O. Gessner, “Incorporation of radiolabeled leucine into protein to estimate bacterial production in plant litter, sediment, epiphytic biofilms, and water samples,” *Microbial Ecology*, vol. 45, no. 3, pp. 291–301, 2003.
79. K. Attermeyer, K. Premke, T. Hornick, S. Hilt, and H.-P. Grossart, “Ecosystem-level studies of terrestrial carbon reveal contrasting bacterial metabolism in different aquatic habitats,” *Ecology*, vol. 94, no. 12, pp. 2754–2766, 2013.
80. F. Azam and M. Simon, “Protein content and protein synthesis rates of planktonic marine bacteria,” *Marine ecology progress series*, vol. 51, no. 3, pp. 213, 201, 1989.
81. D. L. Kirchman, “Leucine Incorporation as a Measure of Biomass Production by Heterotrophic Bacteria,” *Handbook of Methods in Aquatic Microbial Ecology*, pp. 509–512, 1993.
82. O. Nercessian, E. Noyes, M. G. Kalyuzhnaya, M. E. Lidstrom, and L. Chistoserdova, “Bacterial Populations Active in Metabolism of C 1 Compounds in the Sediment of Lake Washington , a Freshwater Lake Bacterial Populations Active in Metabolism of C 1 Compounds in the Sediment of Lake Washington , a Freshwater Lake,” *Society*, vol. 71, no. 11, pp. 6885–6899, 2005.

83. A. Engelbrektson, V. Kunin, K. C. Wrighton, N. Zvenigorodsky, F. Chen, H. Ochman, and P. Hugenholtz, “Experimental factors affecting PCR-based estimates of microbial species richness and evenness,” *The ISME journal*, vol. 4, no. 5, pp. 642–647, 2010.
84. F. Hölker, C. Wurzbacher, C. Weißenborn, M. T. Monaghan, S. I. J. Holzhauer, and K. Premke, “Microbial diversity and community respiration in freshwater sediments influenced by artificial light at night,” *Philosophical transactions of the Royal Society of London. Series B, Biological sciences*, vol. 370, no. 1667, p. 10, 2015.
85. E. Pruesse, J. Peplies, and F. O. Glöckner, “SINA: accurate high throughput multiple sequence alignment of ribosomal RNA genes,” *Bioinformatics*, vol. 28, no. 14, pp. 1823–1829, 2012.
86. C. Quast, E. Pruesse, P. Yilmaz, J. Gerken, T. Schweer, P. Yarza, J. Peplies, and F. Glöckner, “The SILVA ribosomal RNA gene database project: improved data processing and web-based tools,” *Nucleic Acids Research*, vol. 41, no. D1, pp. D590–6, 2013.
87. J. Oksanen, “Vegan: Community ecology package,” *R package version*, vol. 2, 2013.
88. D. W. Roberts, “Statistical analysis of multidimensional fuzzy set ordinations,” *Ecology*, vol. 89, no. 5, pp. 1246–1260, 2008.
89. J. C. Carvalho, P. Cardoso, and P. Gomes, “Determining the relative roles of species replacement and species richness differences in generating beta-diversity patterns,” *Global Ecology and Biogeography*, vol. 21, pp. 760–771, jul 2012.
